# Supplementary material for: Understanding the causal relationships of attention-deficit/hyperactivity disorder with mental disorders and suicide attempt: a network Mendelian randomisation study
Source: HighWire-hosted journal article supplement (doi:10.1136/bmjment-2022-300642), 2023-07-01

## Understanding the causal relationships of Attention-Deficit/Hyperactivity Disorder with mental disorders and suicide attempt: a network Mendelian randomization study

**First author:** Christa Meisinger

|                              |                                                                                                    |
|------------------------------|----------------------------------------------------------------------------------------------------|
| <b>Table of contents</b>     |                                                                                                    |
| <b>Supplementary Methods</b> |                                                                                                    |
| Supplementary Method 1       | Conceptualization of the step-wise network Mendelian randomization design                          |
| Supplementary Method 2       | Description of datasets and cohorts                                                                |
| Supplementary Method 2       | Description of mediation analysis in presence of bidirectional effects                             |
|                              |                                                                                                    |
| <b>Supplementary Tables</b>  |                                                                                                    |
| Supplementary Table 1        | Genetic variants used as potential instruments in the univariable Mendelian randomization analyses |
| Supplementary Table 2        | Identified pleiotropic SNPs by the iterative univariable Mendelian randomization approach          |
| Supplementary Table 3        | Heterogeneity statistics from univariable Mendelian randomization analyses                         |
| Supplementary Table 4        | MR-Steiger tests used in the network MR                                                            |
| Supplementary Table 5        | Heterogeneity statistics from multivariable Mendelian randomization analyses                       |
|                              |                                                                                                    |
| <b>Supplementary Figures</b> |                                                                                                    |
| Supplementary Figure 1       | Meta-analyses of main and secondary univariable Mendelian randomization studies                    |
| Supplementary Figure 2       | Sensitivity analyses of main and secondary univariable Mendelian randomization studies             |
| Supplementary Figure 3       | Meta-analyses of network Mendelian randomization studies                                           |
| Supplementary Figure 4       | Sensitivity analyses of network Mendelian randomization studies                                    |
| Supplementary Figure 5       | Sensitivity analyses of network Mendelian randomization studies                                    |
| Supplementary Figure 6       | Direct effects from multivariable Mendelian randomization analyses                                 |

**Supplementary Method 1** Conceptualization of the step-wise network Mendelian randomization (MR) design. Each arrow represents at least one MR analysis. In the first step, the effects of ADHD on further mental disorders were modelled. In the second step, the ADHD related mental disorders on each other were modelled, if possible, to identify potential mediators or confounding factors. Notable associations are presented as orange colored arrows (step 1) and blue colored arrows (step 2)

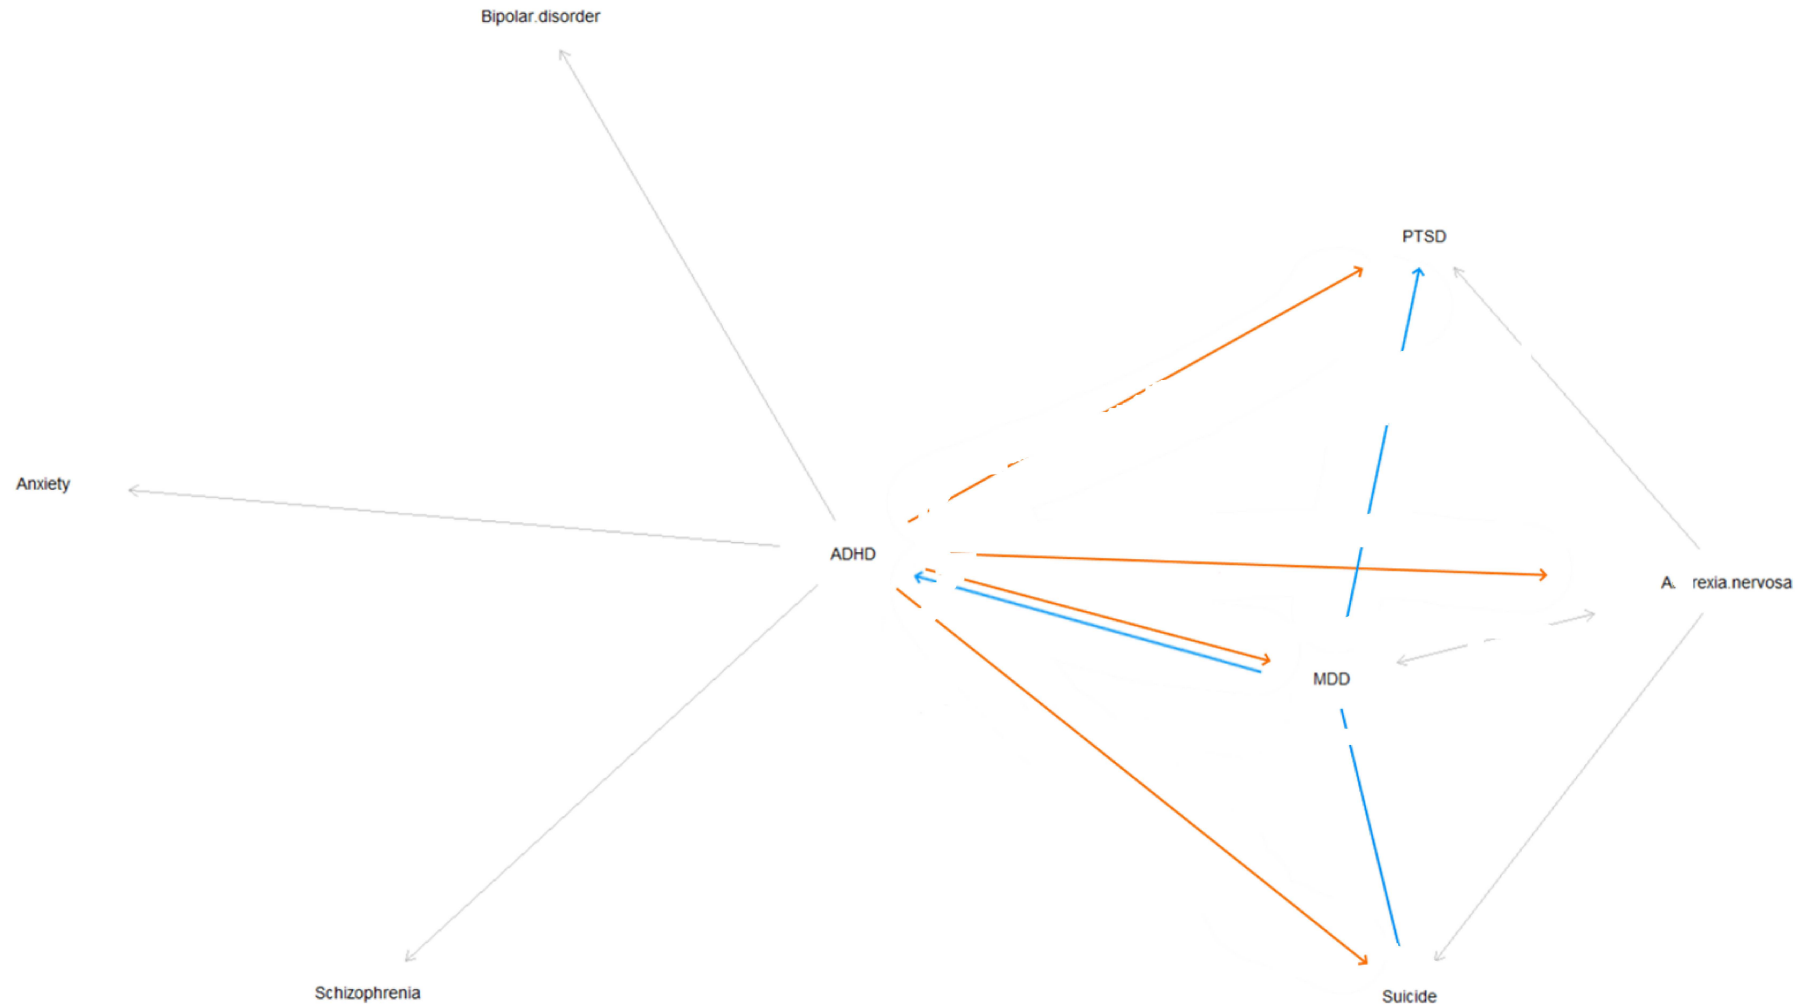

**Supplementary Method 2** Description of datasets and cohorts

ADHD summary level data were derived from the iPSYCH project, based on a meta-analysis across 12 cohorts conducted by the Psychiatric Genomics Consortium<sup>12</sup>. The 19,099 cases (34,194 controls) were diagnosed by psychiatrists according to the ICD10 code.

The anxiety-GWAS consisted of 4,584 cases and 19,225 controls with no anxiety, stress-related or mood diagnoses<sup>14</sup>. Lifetime diagnoses of anxiety and stress-related disorders were obtained from the national Danish registers<sup>14</sup>.

MDD data consisted of a meta-analysis of 33 cohorts (excluding 23andMe data) of the PGC and compared 170,756 cases with 329,443 controls<sup>15</sup>.

PTSD data based on a meta-analysis on up to 42 studies comparing 23,185 cases with 151,309 controls<sup>16</sup>. Diagnosis was established using various instruments and different versions of the DSM (DSM-III-R, DSM IV, DSM-5)<sup>16</sup>.

GWAS summary statistics for bipolar disorder (BD) met the criteria for DSM-IV, ICD-9, or ICD-10 codes and included 41,917 cases and 371,549 controls including 5 cohorts from iPSYCH, deCODE, Estonian Biobank, HUNT study, and UK Biobank<sup>17</sup>.

The anorexia nervosa GWAS contained 16,992 diagnosed individuals and 55,525 controls from 33 cohorts<sup>18</sup>. The majority of samples came from the Anorexia Nervosa Genetics Initiative study, a multi-site recruitment effort in the USA, Sweden, Denmark, and Australia, with assistance from New Zealand. All cases either met the DSM or ICD criteria (DSM-III-R, DSM-IV, ICD-8, ICD-9, or ICD-10) or were based on self-reported diagnosis in the UK Biobank cohort. Note: This dataset was the only one containing genetic variants with an imputation quality score  $\geq 0.7$ .

The schizophrenia GWAS were taken from the 3rd meta-analysis-wave conducted by PGC, which compared 39,910 diagnosed cases with 60,558 controls in a total of 36 cohorts<sup>19</sup>.

In the suicide attempt GWAS overall 6,024 individuals with at least one recorded suicide attempt were compared to 44,240 persons from Denmark aged 15 years and older.

**Supplementary Method 3** Description of mediation analysis in presence of bidirectional effects

Aim: To assess the proportion mediated, which can be calculated as the ratio of the indirect effect and the total effect, in case of a bidirectional association between two exposures. Consider the following associations.

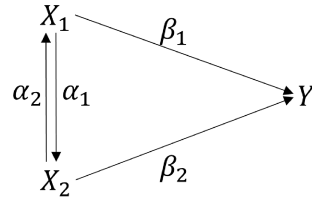

where  $X_1$  and  $X_2$  denote two exposures and  $Y$  the outcome. The bidirectional association of  $X_1$  and  $X_2$  is characterized by paths  $\alpha_1$  and  $\alpha_2$ . The total effect  $\beta_1^*$  of  $X_1$  on  $Y$  can be calculated as  $\beta_1^* = \beta_1 + \alpha_1\beta_2$ , where  $\beta_1$  is the direct effect and  $\alpha_1\beta_2$  the indirect effect. The same states for the effect of  $X_2$  on  $Y$ , where  $\beta_2^* = \beta_2 + \alpha_2\beta_1$ . Usually, the total effect of  $X_1$  on  $Y$  is estimated using univariable MR. To consider the bidirectional relationship between  $X_1$  and  $X_2$  and calculate the “unconfounded” total effects for mediation analysis, the effects  $\beta_1$ ,  $\alpha_1$ , and  $\beta_2$  were estimated separately.  $\alpha_1$  was estimated using univariable MR. The direct effects  $\beta_1$  and  $\beta_2$  were estimated using mutually adjusted MVMR (i.e. conditioning  $X_1$  and  $X_2$  on each other) and in this way accounting for the  $X_1$ - $X_2$ -association. The resulted estimates were also used, to calculate the indirect effect of  $X_1$  on  $Y$  applying the product of coefficients method (i.e.  $\alpha_1 \cdot \beta_2$ ).

Finally, the estimated indirect and total effects were used to calculate the proportion of the  $X_1$ - $Y$ -association mediated by  $X_2$  in the following way

$$\text{proportion mediated} = \frac{\alpha_1\beta_2}{\beta_1^*}$$

All calculations were done on the log scale.

**Supplementary Table 1** Genetic variants used as potential instruments in the univariable Mendelian randomization analyses investigating the effects of ADHD on psychiatric outcomes

| Exposure             | Outcome          | SNP        | CHR | POS       | EA | OA | b_exp       | se_exp | pval_exp  | b_otcm      | se_otcm | pval_otcm |
|----------------------|------------------|------------|-----|-----------|----|----|-------------|--------|-----------|-------------|---------|-----------|
| <b>Main analyses</b> |                  |            |     |           |    |    |             |        |           |             |         |           |
| ADHD                 | anorexia nervosa | rs10262192 | 7   | 114091753 | A  | G  | 0,07409583  | 0,0135 | 3,655E-08 | 0,033805    | 0,0137  | 0,01352   |
| ADHD                 | anorexia nervosa | rs11591402 | 10  | 106747354 | A  | T  | -0,09240042 | 0,0164 | 1,76E-08  | -0,05399564 | 0,0164  | 0,0009615 |
| ADHD                 | anorexia nervosa | rs1222063  | 1   | 96602440  | A  | G  | 0,09620069  | 0,0174 | 3,068E-08 | 0,01740051  | 0,0152  | 0,253     |
| ADHD                 | anorexia nervosa | rs1427829  | 12  | 89760744  | A  | G  | 0,08219731  | 0,0136 | 1,349E-09 | 0,02430229  | 0,0135  | 0,0721    |
| ADHD                 | anorexia nervosa | rs17531412 | 1   | 44182244  | A  | G  | 0,10539552  | 0,0148 | 1,072E-12 | 0,0145043   | 0,0147  | 0,3213    |
| ADHD                 | anorexia nervosa | rs28411770 | 4   | 31151456  | T  | C  | 0,0861043   | 0,0151 | 1,152E-08 | 0,03859552  | 0,0146  | 0,008107  |
| ADHD                 | anorexia nervosa | rs4858241  | 3   | 20669071  | T  | G  | 0,08219731  | 0,0143 | 8,172E-09 | -0,01059594 | 0,014   | 0,4509    |
| ADHD                 | anorexia nervosa | rs4916723  | 5   | 87854395  | A  | C  | -0,07779939 | 0,0138 | 1,807E-08 | 0,01419872  | 0,0141  | 0,3145    |
| ADHD                 | anorexia nervosa | rs74760947 | 8   | 34352610  | A  | G  | -0,17960525 | 0,0317 | 1,393E-08 | -0,0797036  | 0,0331  | 0,016     |
| ADHD                 | anorexia nervosa | rs8039398  | 15  | 47730870  | T  | C  | -0,07999604 | 0,0135 | 2,986E-09 | -0,03770187 | 0,0134  | 0,004942  |
| ADHD                 | anxiety          | rs10262192 | 7   | 114091753 | A  | G  | 0,07409583  | 0,0135 | 3,655E-08 | 0,00169856  | 0,0243  | 0,9456    |
| ADHD                 | anxiety          | rs11591402 | 10  | 106747354 | A  | T  | -0,09240042 | 0,0164 | 1,76E-08  | -0,07239866 | 0,0295  | 0,01419   |
| ADHD                 | anxiety          | rs1427829  | 12  | 89760744  | A  | G  | 0,08219731  | 0,0136 | 1,349E-09 | 0,07160413  | 0,0245  | 0,0034    |
| ADHD                 | anxiety          | rs17531412 | 1   | 44182244  | A  | G  | 0,10539552  | 0,0148 | 1,072E-12 | 0,00159872  | 0,0266  | 0,9531    |
| ADHD                 | anxiety          | rs212178   | 16  | 72578131  | A  | G  | -0,11709577 | 0,0205 | 1,198E-08 | -0,02979963 | 0,0374  | 0,425     |
| ADHD                 | anxiety          | rs4858241  | 3   | 20669071  | T  | G  | 0,08219731  | 0,0143 | 8,172E-09 | 0,02740114  | 0,0253  | 0,2778    |
| ADHD                 | anxiety          | rs4916723  | 5   | 87854395  | A  | C  | -0,07779939 | 0,0138 | 1,807E-08 | 0,02759571  | 0,0255  | 0,2791    |
| ADHD                 | anxiety          | rs74760947 | 8   | 34352610  | A  | G  | -0,17960525 | 0,0317 | 1,393E-08 | -0,12360369 | 0,0573  | 0,03111   |
| ADHD                 | anxiety          | rs8039398  | 15  | 47730870  | T  | C  | -0,07999604 | 0,0135 | 2,986E-09 | -0,00130085 | 0,0244  | 0,9575    |
| ADHD                 | bipolar disorder | rs10262192 | 7   | 114091753 | A  | G  | 0,07409583  | 0,0135 | 3,655E-08 | 0,01630216  | 0,0094  | 0,0825    |
| ADHD                 | bipolar disorder | rs11591402 | 10  | 106747354 | A  | T  | -0,09240042 | 0,0164 | 1,76E-08  | -0,02649586 | 0,0113  | 0,01896   |
| ADHD                 | bipolar disorder | rs1427829  | 12  | 89760744  | A  | G  | 0,08219731  | 0,0136 | 1,349E-09 | 0,00229736  | 0,0094  | 0,8084    |
| ADHD                 | bipolar disorder | rs17531412 | 1   | 44182244  | A  | G  | 0,10539552  | 0,0148 | 1,072E-12 | 0,0246048   | 0,0102  | 0,01526   |
| ADHD                 | bipolar disorder | rs212178   | 16  | 72578131  | A  | G  | -0,11709577 | 0,0205 | 1,198E-08 | 0,00439966  | 0,0151  | 0,773     |
| ADHD                 | bipolar disorder | rs4858241  | 3   | 20669071  | T  | G  | 0,08219731  | 0,0143 | 8,172E-09 | -0,00220242 | 0,0097  | 0,8218    |
| ADHD                 | bipolar disorder | rs4916723  | 5   | 87854395  | A  | C  | -0,07779939 | 0,0138 | 1,807E-08 | -0,00010001 | 0,0096  | 0,9949    |
| ADHD                 | bipolar disorder | rs8039398  | 15  | 47730870  | T  | C  | -0,07999604 | 0,0135 | 2,986E-09 | 0,00560427  | 0,0093  | 0,5496    |

|      |                 |            |    |           |   |   |             |        |           |             |        |           |
|------|-----------------|------------|----|-----------|---|---|-------------|--------|-----------|-------------|--------|-----------|
| ADHD | MDD             | rs10262192 | 7  | 114091753 | A | G | 0,07409583  | 0,0135 | 3,655E-08 | 0,0147      | 0,0043 | 0,0006712 |
| ADHD | MDD             | rs1427829  | 12 | 89760744  | A | G | 0,08219731  | 0,0136 | 1,349E-09 | 0,0087      | 0,0043 | 0,0446    |
| ADHD | MDD             | rs17531412 | 1  | 44182244  | A | G | 0,10539552  | 0,0148 | 1,072E-12 | 0,0116      | 0,0047 | 0,01328   |
| ADHD | MDD             | rs212178   | 16 | 72578131  | A | G | -0,11709577 | 0,0205 | 1,198E-08 | -0,001      | 0,0068 | 0,8788    |
| ADHD | MDD             | rs4858241  | 3  | 20669071  | T | G | 0,08219731  | 0,0143 | 8,172E-09 | 0,0133      | 0,0045 | 0,002808  |
| ADHD | MDD             | rs74760947 | 8  | 34352610  | A | G | -0,17960525 | 0,0317 | 1,393E-08 | 0,0029      | 0,0103 | 0,775     |
| ADHD | MDD             | rs8039398  | 15 | 47730870  | T | C | -0,07999604 | 0,0135 | 2,986E-09 | -0,0018     | 0,0043 | 0,669     |
| ADHD | PTSD            | rs10262192 | 7  | 114091753 | A | G | 0,07409583  | 0,0135 | 3,655E-08 | 0,04469608  | 0,0147 | 0,002404  |
| ADHD | PTSD            | rs11591402 | 10 | 106747354 | A | T | -0,09240042 | 0,0164 | 1,76E-08  | -0,01139973 | 0,018  | 0,5275    |
| ADHD | PTSD            | rs1222063  | 1  | 96602440  | A | G | 0,09620069  | 0,0174 | 3,068E-08 | 0,02580419  | 0,0178 | 0,1471    |
| ADHD | PTSD            | rs1427829  | 12 | 89760744  | A | G | 0,08219731  | 0,0136 | 1,349E-09 | 0,02819865  | 0,0147 | 0,05561   |
| ADHD | PTSD            | rs17531412 | 1  | 44182244  | A | G | 0,10539552  | 0,0148 | 1,072E-12 | -0,0010005  | 0,0161 | 0,9494    |
| ADHD | PTSD            | rs212178   | 16 | 72578131  | A | G | -0,11709577 | 0,0205 | 1,198E-08 | -0,02420048 | 0,0236 | 0,3054    |
| ADHD | PTSD            | rs28411770 | 4  | 31151456  | T | C | 0,0861043   | 0,0151 | 1,152E-08 | -0,00989984 | 0,0171 | 0,5622    |
| ADHD | PTSD            | rs4858241  | 3  | 20669071  | T | G | 0,08219731  | 0,0143 | 8,172E-09 | 0,01580445  | 0,0154 | 0,3036    |
| ADHD | PTSD            | rs4916723  | 5  | 87854395  | A | C | -0,07779939 | 0,0138 | 1,807E-08 | -0,0154995  | 0,0151 | 0,3052    |
| ADHD | PTSD            | rs74760947 | 8  | 34352610  | A | G | -0,17960525 | 0,0317 | 1,393E-08 | -0,03779948 | 0,0361 | 0,2945    |
| ADHD | PTSD            | rs8039398  | 15 | 47730870  | T | C | -0,07999604 | 0,0135 | 2,986E-09 | 0,0009995   | 0,0147 | 0,9436    |
| ADHD | schizophrenia   | rs10262192 | 7  | 114091753 | A | G | 0,07409583  | 0,0135 | 3,655E-08 | 0,02089683  | 0,0087 | 0,01613   |
| ADHD | schizophrenia   | rs1427829  | 12 | 89760744  | A | G | 0,08219731  | 0,0136 | 1,349E-09 | -0,01089918 | 0,0087 | 0,2083    |
| ADHD | schizophrenia   | rs212178   | 16 | 72578131  | A | G | -0,11709577 | 0,0205 | 1,198E-08 | 0,01290289  | 0,0141 | 0,3606    |
| ADHD | schizophrenia   | rs4858241  | 3  | 20669071  | T | G | 0,08219731  | 0,0143 | 8,172E-09 | 0,00219758  | 0,009  | 0,8058    |
| ADHD | schizophrenia   | rs4916723  | 5  | 87854395  | A | C | -0,07779939 | 0,0138 | 1,807E-08 | 0,00029996  | 0,0088 | 0,9721    |
| ADHD | schizophrenia   | rs8039398  | 15 | 47730870  | T | C | -0,07999604 | 0,0135 | 2,986E-09 | -0,00470103 | 0,0086 | 0,5885    |
| ADHD | suicide attempt | rs10262192 | 7  | 114091753 | A | G | 0,07409583  | 0,0135 | 3,655E-08 | 0,05145     | 0,0197 | 0,00903   |
| ADHD | suicide attempt | rs1427829  | 12 | 89760744  | A | G | 0,08219731  | 0,0136 | 1,349E-09 | 0,04751     | 0,0199 | 0,01714   |
| ADHD | suicide attempt | rs17531412 | 1  | 44182244  | A | G | 0,10539552  | 0,0148 | 1,072E-12 | 0,03263     | 0,0215 | 0,1292    |
| ADHD | suicide attempt | rs212178   | 16 | 72578131  | A | G | -0,11709577 | 0,0205 | 1,198E-08 | 0,003892    | 0,0307 | 0,8987    |
| ADHD | suicide attempt | rs28411770 | 4  | 31151456  | T | C | 0,0861043   | 0,0151 | 1,152E-08 | 0,03211     | 0,0212 | 0,1308    |
| ADHD | suicide attempt | rs4858241  | 3  | 20669071  | T | G | 0,08219731  | 0,0143 | 8,172E-09 | 0,01339     | 0,0205 | 0,515     |
| ADHD | suicide attempt | rs4916723  | 5  | 87854395  | A | C | -0,07779939 | 0,0138 | 1,807E-08 | -0,009455   | 0,0204 | 0,641     |
| ADHD | suicide attempt | rs74760947 | 8  | 34352610  | A | G | -0,17960525 | 0,0317 | 1,393E-08 | -0,02372    | 0,0468 | 0,6129    |

|                           |                  |            |    |           |   |   |             |        |           |          |         |         |
|---------------------------|------------------|------------|----|-----------|---|---|-------------|--------|-----------|----------|---------|---------|
| ADHD                      | suicide attempt  | rs8039398  | 15 | 47730870  | T | C | -0,07999604 | 0,0135 | 2,986E-09 | -0,0199  | 0,0198  | 0,314   |
| <b>Secondary analyses</b> |                  |            |    |           |   |   |             |        |           |          |         |         |
| ADHD                      | anorexia nervosa | rs11591402 | 10 | 106747354 | A | T | -0,09240042 | 0,0164 | 1,76E-08  | 0,02935  | 0,04709 | 0,533   |
| ADHD                      | anorexia nervosa | rs1427829  | 12 | 89760744  | A | G | 0,08219731  | 0,0136 | 1,349E-09 | 0,04074  | 0,04199 | 0,332   |
| ADHD                      | anorexia nervosa | rs17531412 | 1  | 44182244  | A | G | 0,10539552  | 0,0148 | 1,072E-12 | 0,01301  | 0,04281 | 0,761   |
| ADHD                      | anorexia nervosa | rs212178   | 16 | 72578131  | A | G | -0,11709577 | 0,0205 | 1,198E-08 | 0,04833  | 0,08497 | 0,57    |
| ADHD                      | anorexia nervosa | rs4858241  | 3  | 20669071  | T | G | 0,08219731  | 0,0143 | 8,172E-09 | 0,00163  | 0,0436  | 0,97    |
| ADHD                      | anorexia nervosa | rs74760947 | 8  | 34352610  | A | G | -0,17960525 | 0,0317 | 1,393E-08 | -0,13763 | 0,07824 | 0,0785  |
| ADHD                      | anorexia nervosa | rs8039398  | 15 | 47730870  | T | C | -0,07999604 | 0,0135 | 2,986E-09 | -0,01412 | 0,04143 | 0,733   |
| ADHD                      | anxiety          | rs10262192 | 7  | 114091753 | A | G | 0,07409583  | 0,0135 | 3,655E-08 | -0,00601 | 0,02907 | 0,836   |
| ADHD                      | anxiety          | rs11591402 | 10 | 106747354 | A | T | -0,09240042 | 0,0164 | 1,76E-08  | -0,02185 | 0,03312 | 0,509   |
| ADHD                      | anxiety          | rs1427829  | 12 | 89760744  | A | G | 0,08219731  | 0,0136 | 1,349E-09 | 0,01482  | 0,02951 | 0,616   |
| ADHD                      | anxiety          | rs17531412 | 1  | 44182244  | A | G | 0,10539552  | 0,0148 | 1,072E-12 | -0,01324 | 0,03017 | 0,661   |
| ADHD                      | anxiety          | rs212178   | 16 | 72578131  | A | G | -0,11709577 | 0,0205 | 1,198E-08 | -0,00774 | 0,05915 | 0,896   |
| ADHD                      | anxiety          | rs4858241  | 3  | 20669071  | T | G | 0,08219731  | 0,0143 | 8,172E-09 | -0,02125 | 0,0305  | 0,486   |
| ADHD                      | anxiety          | rs4916723  | 5  | 87854395  | A | C | -0,07779939 | 0,0138 | 1,807E-08 | 0,01144  | 0,02868 | 0,69    |
| ADHD                      | anxiety          | rs74760947 | 8  | 34352610  | A | G | -0,17960525 | 0,0317 | 1,393E-08 | -0,00771 | 0,05606 | 0,891   |
| ADHD                      | anxiety          | rs8039398  | 15 | 47730870  | T | C | -0,07999604 | 0,0135 | 2,986E-09 | -0,00763 | 0,02913 | 0,793   |
| ADHD                      | bipolar disorder | rs10262192 | 7  | 114091753 | A | G | 0,07409583  | 0,0135 | 3,655E-08 | 0,01262  | 0,02301 | 0,583   |
| ADHD                      | bipolar disorder | rs11591402 | 10 | 106747354 | A | T | -0,09240042 | 0,0164 | 1,76E-08  | -0,04315 | 0,02614 | 0,0988  |
| ADHD                      | bipolar disorder | rs1427829  | 12 | 89760744  | A | G | 0,08219731  | 0,0136 | 1,349E-09 | 0,0525   | 0,02337 | 0,0247  |
| ADHD                      | bipolar disorder | rs17531412 | 1  | 44182244  | A | G | 0,10539552  | 0,0148 | 1,072E-12 | 0,01305  | 0,02393 | 0,585   |
| ADHD                      | bipolar disorder | rs212178   | 16 | 72578131  | A | G | -0,11709577 | 0,0205 | 1,198E-08 | -0,02987 | 0,04711 | 0,526   |
| ADHD                      | bipolar disorder | rs4858241  | 3  | 20669071  | T | G | 0,08219731  | 0,0143 | 8,172E-09 | -0,00944 | 0,02403 | 0,695   |
| ADHD                      | bipolar disorder | rs4916723  | 5  | 87854395  | A | C | -0,07779939 | 0,0138 | 1,807E-08 | -0,01268 | 0,02269 | 0,576   |
| ADHD                      | bipolar disorder | rs74760947 | 8  | 34352610  | A | G | -0,17960525 | 0,0317 | 1,393E-08 | -0,08398 | 0,04384 | 0,0554  |
| ADHD                      | bipolar disorder | rs8039398  | 15 | 47730870  | T | C | -0,07999604 | 0,0135 | 2,986E-09 | 0,00923  | 0,02301 | 0,688   |
| ADHD                      | PTSD             | rs10262192 | 7  | 114091753 | A | G | 0,07409583  | 0,0135 | 3,655E-08 | -0,00526 | 0,04066 | 0,897   |
| ADHD                      | PTSD             | rs11591402 | 10 | 106747354 | A | T | -0,09240042 | 0,0164 | 1,76E-08  | -0,13685 | 0,0463  | 0,00312 |
| ADHD                      | PTSD             | rs1427829  | 12 | 89760744  | A | G | 0,08219731  | 0,0136 | 1,349E-09 | -0,0117  | 0,04139 | 0,777   |
| ADHD                      | PTSD             | rs17531412 | 1  | 44182244  | A | G | 0,10539552  | 0,0148 | 1,072E-12 | -0,00812 | 0,04199 | 0,847   |
| ADHD                      | PTSD             | rs212178   | 16 | 72578131  | A | G | -0,11709577 | 0,0205 | 1,198E-08 | 0,04712  | 0,0828  | 0,569   |

|      |               |            |    |           |   |   |             |        |           |          |         |         |
|------|---------------|------------|----|-----------|---|---|-------------|--------|-----------|----------|---------|---------|
| ADHD | PTSD          | rs4858241  | 3  | 20669071  | T | G | 0,08219731  | 0,0143 | 8,172E-09 | 0,03833  | 0,04278 | 0,37    |
| ADHD | PTSD          | rs4916723  | 5  | 87854395  | A | C | -0,07779939 | 0,0138 | 1,807E-08 | 0,01707  | 0,04002 | 0,67    |
| ADHD | PTSD          | rs74760947 | 8  | 34352610  | A | G | -0,17960525 | 0,0317 | 1,393E-08 | -0,08588 | 0,07696 | 0,264   |
| ADHD | PTSD          | rs8039398  | 15 | 47730870  | T | C | -0,07999604 | 0,0135 | 2,986E-09 | -0,04614 | 0,0408  | 0,258   |
| ADHD | schizophrenia | rs10262192 | 7  | 114091753 | A | G | 0,07409583  | 0,0135 | 3,655E-08 | -0,08293 | 0,03047 | 0,00649 |
| ADHD | schizophrenia | rs11591402 | 10 | 106747354 | A | T | -0,09240042 | 0,0164 | 1,76E-08  | -0,02082 | 0,03439 | 0,545   |
| ADHD | schizophrenia | rs1427829  | 12 | 89760744  | A | G | 0,08219731  | 0,0136 | 1,349E-09 | 0,00895  | 0,03082 | 0,772   |
| ADHD | schizophrenia | rs17531412 | 1  | 44182244  | A | G | 0,10539552  | 0,0148 | 1,072E-12 | 0,00663  | 0,03149 | 0,833   |
| ADHD | schizophrenia | rs212178   | 16 | 72578131  | A | G | -0,11709577 | 0,0205 | 1,198E-08 | -0,03677 | 0,06244 | 0,556   |
| ADHD | schizophrenia | rs4858241  | 3  | 20669071  | T | G | 0,08219731  | 0,0143 | 8,172E-09 | 0,00342  | 0,03162 | 0,914   |
| ADHD | schizophrenia | rs4916723  | 5  | 87854395  | A | C | -0,07779939 | 0,0138 | 1,807E-08 | 0,0272   | 0,02983 | 0,362   |
| ADHD | schizophrenia | rs74760947 | 8  | 34352610  | A | G | -0,17960525 | 0,0317 | 1,393E-08 | -0,07138 | 0,05746 | 0,214   |
| ADHD | schizophrenia | rs8039398  | 15 | 47730870  | T | C | -0,07999604 | 0,0135 | 2,986E-09 | 0,05646  | 0,03028 | 0,0623  |



**Supplementary Table 2** Identified pleiotropic SNPs by the iterative univariable Mendelian randomization approach regarding a significance threshold 0.01

| Exposure                  | Outcome          | Iteration | SNP        | Q statistic | P value |
|---------------------------|------------------|-----------|------------|-------------|---------|
| <b>Main analyses</b>      |                  |           |            |             |         |
| ADHD                      | anorexia nervosa | 1         | rs212178   | 9,249       | 2,4E-03 |
| ADHD                      | bipolar disorder | 1         | rs74760947 | 15,134      | 1,0E-04 |
| ADHD                      | MDD              | 1         | rs11591402 | 12,003      | 5,3E-04 |
| ADHD                      | MDD              | 1         | rs4916723  | 17,687      | 2,6E-05 |
| ADHD                      | schizophrenia    | 1         | rs1427829  | 7,902       | 4,9E-03 |
| ADHD                      | schizophrenia    | 1         | rs74760947 | 11,269      | 7,9E-04 |
| ADHD                      | schizophrenia    | 2         | rs17531412 | 10,634      | 1,1E-03 |
| ADHD                      | suicide attempt  | 1         | rs11591402 | 10,203      | 1,4E-03 |
| <b>Secondary analyses</b> |                  |           |            |             |         |
| ADHD                      | anorexia nervosa | 1         | rs10262192 | 8,099       | 4,4E-03 |
| ADHD                      | anorexia nervosa | 1         | rs4916723  | 8,741       | 3,1E-03 |

**Supplementary Table 3** Results of the MR-PRESSO global and MR-Egger-intercept tests for detecting horizontal and directional pleiotropy and between SNP-heterogeneity based on the radial regression framework in the univariable network Mendelian randomization setting

| Exposure | Outcome                    | PRESSO RSSobs | P <sub>RSSobs</sub> | Egger intercept | P <sub>intercept</sub> | Cochrans Q | df     | P <sub>Q</sub> | Rueckers Q' | P <sub>Q'</sub> | Q-Q'   | P <sub>Q-Q'</sub> | Q'/Q  |
|----------|----------------------------|---------------|---------------------|-----------------|------------------------|------------|--------|----------------|-------------|-----------------|--------|-------------------|-------|
| ADHD     | Anorexia nervosa (PGC)     | 24,999        | 0,034               | 3,783           | 0,517                  | 19,210     | 9      | 0,023          | 16,551      | 0,056           | 2,659  | 0,103             | 0,862 |
| ADHD     | Anxiety (iPSYCH)           | 18,071        | 0,102               | 1,808           | 0,762                  | 13,955     | 8      | 0,083          | 13,810      | 0,087           | 0,145  | 0,703             | 0,990 |
| ADHD     | Bipolar disorder (PGC)     | 13,938        | 0,179               | -3,396          | 0,418                  | 10,333     | 7      | 0,170          | 5,356       | 0,617           | 4,977  | 0,026             | 0,518 |
| ADHD     | MDD (PGC)                  | 16,417        | 0,101               | -1,896          | 0,739                  | 11,602     | 6      | 0,071          | 7,851       | 0,249           | 3,751  | 0,053             | 0,677 |
| ADHD     | PTSD (PGC)                 | 12,831        | 0,421               | 4,049           | 0,264                  | 10,318     | 10     | 0,413          | 7,075       | 0,718           | 3,243  | 0,072             | 0,686 |
| ADHD     | Schizophrenia (PGC)        | 11,901        | 0,170               | 10,354          | 0,320                  | 8,395      | 5      | 0,136          | 2,546       | 0,770           | 5,849  | 0,016             | 0,303 |
| ADHD     | Suicide attempt (iPSYCH)   | 7,984         | 0,640               | -1,194          | 0,751                  | 6,194      | 8      | 0,626          | 5,343       | 0,720           | 0,851  | 0,356             | 0,863 |
| ADHD     | Anorexia nervosa (FinnGen) | 5,427         | 0,704               | -2,358          | 0,251                  | 3,902      | 6      | 0,690          | 2,335       | 0,886           | 1,567  | 0,211             | 0,598 |
| ADHD     | Anxiety (FinnGen)          | 2,130         | 0,989               | 0,445           | 0,709                  | 1,670      | 8      | 0,990          | 1,625       | 0,990           | 0,045  | 0,832             | 0,973 |
| ADHD     | Bipolar disorder (FinnGen) | 8,765         | 0,570               | -0,454          | 0,850                  | 6,721      | 8      | 0,567          | 6,475       | 0,594           | 0,246  | 0,620             | 0,963 |
| ADHD     | PTSD (FinnGen)             | 12,885        | 0,288               | -0,977          | 0,735                  | 10,122     | 8      | 0,257          | 9,363       | 0,313           | 0,759  | 0,384             | 0,925 |
| ADHD     | Schizophrenia (FinnGen)    | 17,092        | 0,113               | -2,065          | 0,530                  | 13,620     | 8      | 0,092          | 11,553      | 0,172           | 2,067  | 0,151             | 0,848 |
| MDD      | AN                         | 44,566        | 0,632               | -1,447          | 0,185                  | 41,133     | 45,000 | 0,636          | 34,463      | 0,873           | 6,671  | 0,010             | 0,838 |
| MDD      | PTSD (PGC)                 | 60,938        | 0,048               | -2,042          | 0,118                  | 58,076     | 42,000 | 0,050          | 49,160      | 0,208           | 8,916  | 0,003             | 0,846 |
| MDD      | PTSD (FinnGen)             | 72,358        | 0,006               | -2,022          | 0,167                  | 66,587     | 41,000 | 0,007          | 49,853      | 0,162           | 16,734 | 0,000             | 0,749 |
| MDD      | AN (PGC)                   | 43,947        | 0,478               | -0,071          | 0,948                  | 41,962     | 42,000 | 0,473          | 41,939      | 0,474           | 0,022  | 0,881             | 0,999 |
| MDD      | AN (FinnGen)               | 47,243        | 0,219               | -1,628          | 0,342                  | 44,448     | 38,000 | 0,219          | 38,050      | 0,467           | 6,399  | 0,011             | 0,856 |
| MDD      | Suicide attempt            | 42,777        | 0,490               | -0,020          | 0,989                  | 39,598     | 40,000 | 0,488          | 39,512      | 0,492           | 0,087  | 0,769             | 0,998 |
| MDD      | ADHD                       | 5,947         | 0,551               | -4,026          | 0,042                  | 3,977      | 5,000  | 0,553          | 0,678       | 0,984           | 3,298  | 0,069             | 0,171 |
| AN (PGC) | ADHD                       | 44,566        | 0,632               | -1,447          | 0,185                  | 41,133     | 45,000 | 0,636          | 34,463      | 0,873           | 6,671  | 0,010             | 0,838 |

**Supplementary Table 4** Results of MR-Steiger tests from network Mendelian randomization analyses investigating possible reverse causation

| Exposure         | Outcome          | Consortia | snp_r2.exposure | snp_r2.outcome | correct_causal_direction | steiger_pval |
|------------------|------------------|-----------|-----------------|----------------|--------------------------|--------------|
| ADHD             | Schizophrenia    | PGC       | 0,002685        | 0,000049       | TRUE                     | 6,20E-17     |
| ADHD             | Schizophrenia    | FinnGen   | 0,004397        | 0,000955       | TRUE                     | 1,11E-13     |
| ADHD             | Anorexia nervosa | PGC       | 0,005196        | 0,000665       | TRUE                     | 4,51E-16     |
| ADHD             | Anorexia nervosa | FinnGen   | 0,003541        | 0,000608       | TRUE                     | 7,41E-04     |
| ADHD             | PTSD             | PGC       | 0,005583        | 0,000344       | TRUE                     | 6,79E-30     |
| ADHD             | PTSD             | FinnGen   | 0,003830        | 0,000259       | TRUE                     | 2,10E-23     |
| ADHD             | Anxiety          | iPSYCH    | 0,004397        | 0,001059       | TRUE                     | 3,11E-05     |
| ADHD             | Anxiety          | FinnGen   | 0,004397        | 0,000094       | TRUE                     | 3,45E-32     |
| ADHD             | Bipolar disorder | PGC       | 0,003830        | 0,000099       | TRUE                     | 1,25E-29     |
| ADHD             | Bipolar disorder | FinnGen   | 0,003830        | 0,000259       | TRUE                     | 2,10E-23     |
| ADHD             | MDD              | PGC       | 0,003496        | 0,000044       | TRUE                     | 1,23E-30     |
| ADHD             | Suicide attempt  | iPSYCH    | 0,004469        | 0,000566       | TRUE                     | 4,47E-12     |
| MDD              | PTSD             | PGC       | 0,002537        | 0,001701       | TRUE                     | 1,01E-03     |
| MDD              | PTSD             | FinnGen   | 0,002388        | 0,007656       | FALSE                    | 1,29E-54     |
| MDD              | Anorexia nervosa | PGC       | 0,002283        | 0,001718       | TRUE                     | 1,11E-01     |
| MDD              | Anorexia nervosa | FinnGen   | 0,002376        | 0,005352       | FALSE                    | 9,69E-03     |
| MDD              | Suicide attempt  | iPSYCH    | 0,002104        | 0,001824       | TRUE                     | 4,99E-01     |
| MDD              | ADHD             | PGC       | 0,002185        | 0,001221       | TRUE                     | 9,43E-03     |
| Anorexia nervosa | ADHD             | PGC       | 0,003314        | 0,000064       | TRUE                     | 3,36E-18     |

**Supplementary Table 5** Results of the MR-Egger intercept tests for detecting directional pleiotropy and between SNP-heterogeneity based on the multivariable Mendelian randomization setting

| Exposure | Outcome | heter_stat | heter_pval | intercept | interc_pval |
|----------|---------|------------|------------|-----------|-------------|
| ADHD     | PTSD    | 55,823     | 0,298      | 0,001     | 0,764       |
| MDD      | PTSD    | 55,823     | 0,298      | 0,001     | 0,764       |
| ADHD     | Suicide | 58,446     | 0,071      | 0,002     | 0,785       |
| MDD      | Suicide | 58,446     | 0,071      | 0,002     | 0,785       |

**Supplementary Figure 1** Meta-analyses of main and secondary univariable Mendelian randomization studies investigating the effects of ADHD on psychiatric outcomes

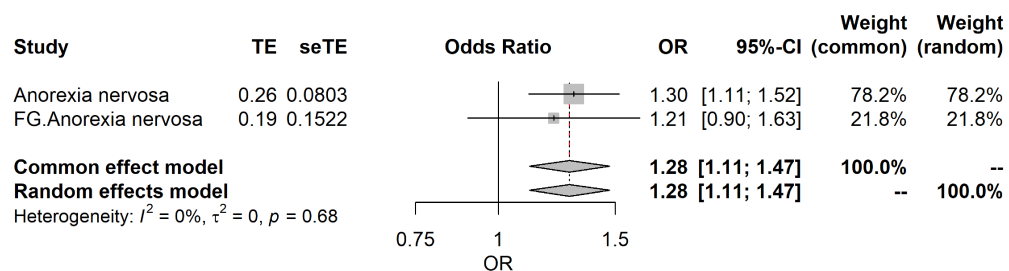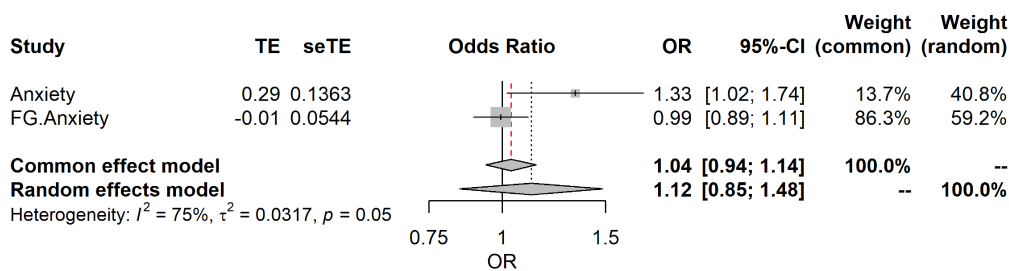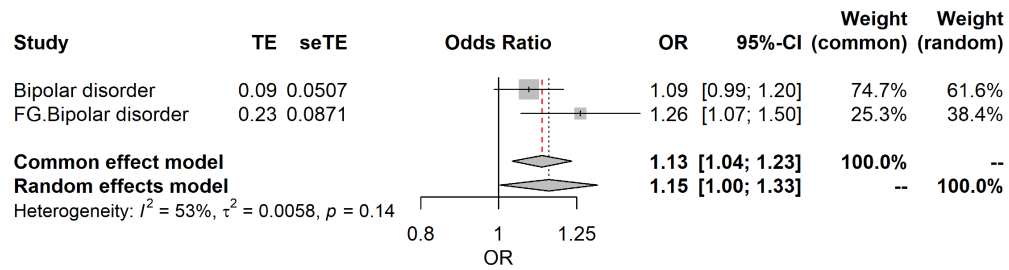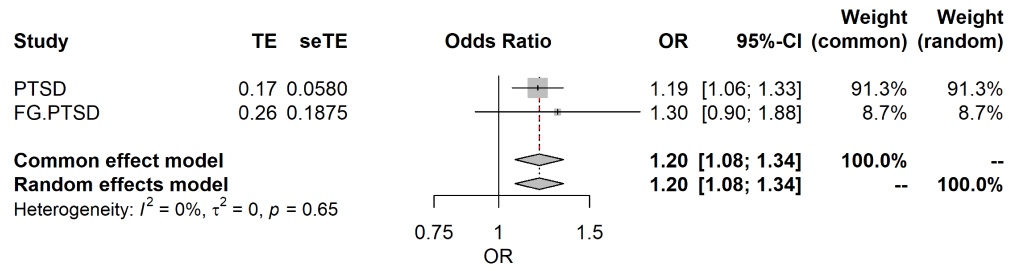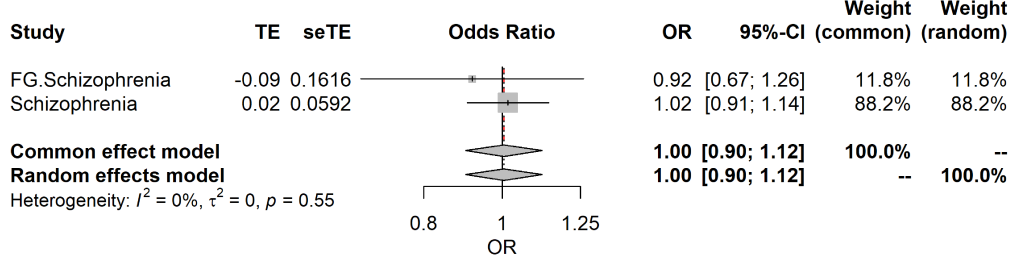

**Supplementary Figure 2** Sensitivity analyses of main and secondary univariable Mendelian randomization studies investigating the effects of ADHD on psychiatric outcomes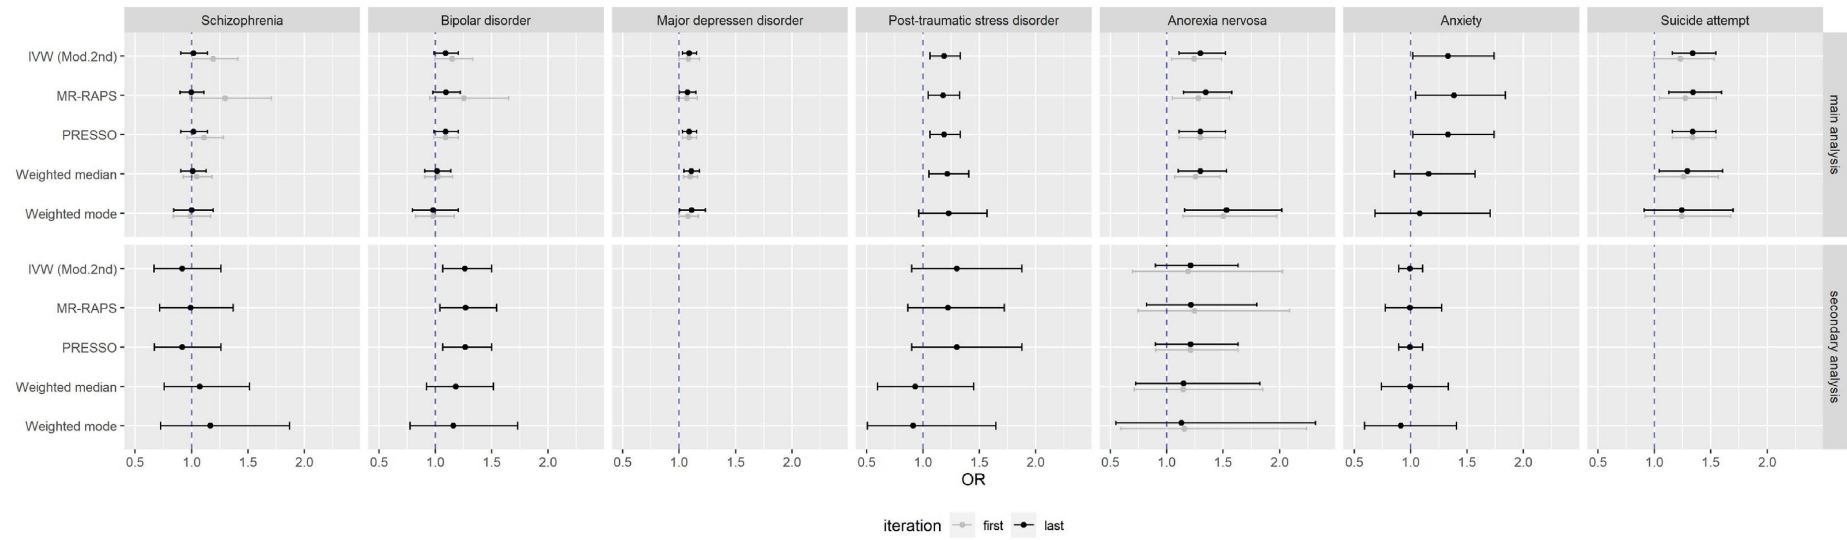

**Supplementary Figure 3** Meta-analyses of network Mendelian randomization studies investigating the effects of major depression disorder and anorexia nervosa on psychiatric outcomes

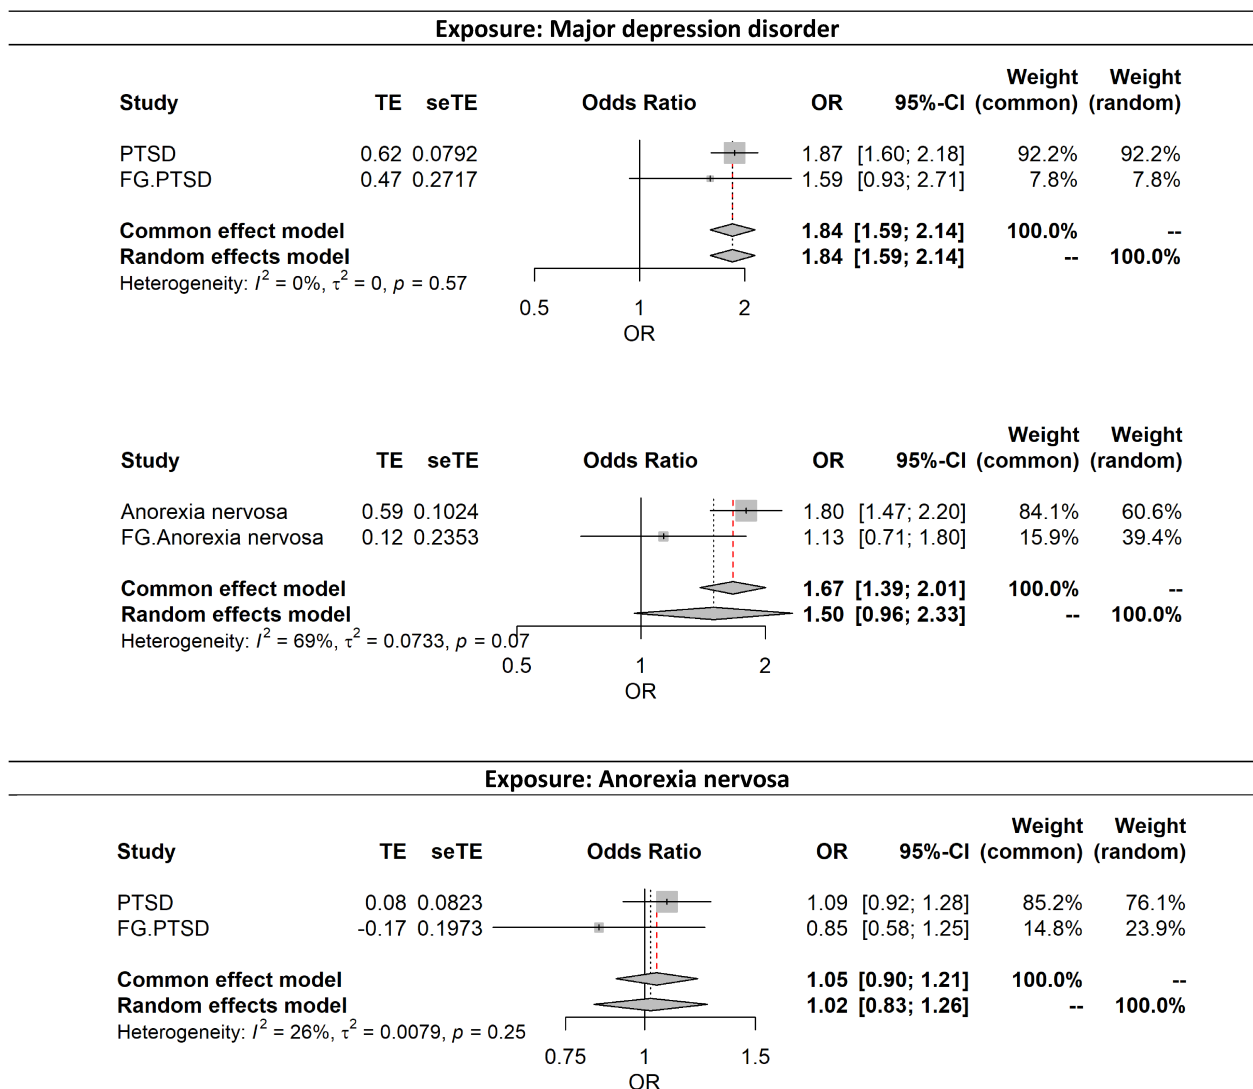

**Supplementary Figure 4** Sensitivity analyses of network Mendelian randomization studies investigating the effects of major depression disorder on psychiatric outcomes

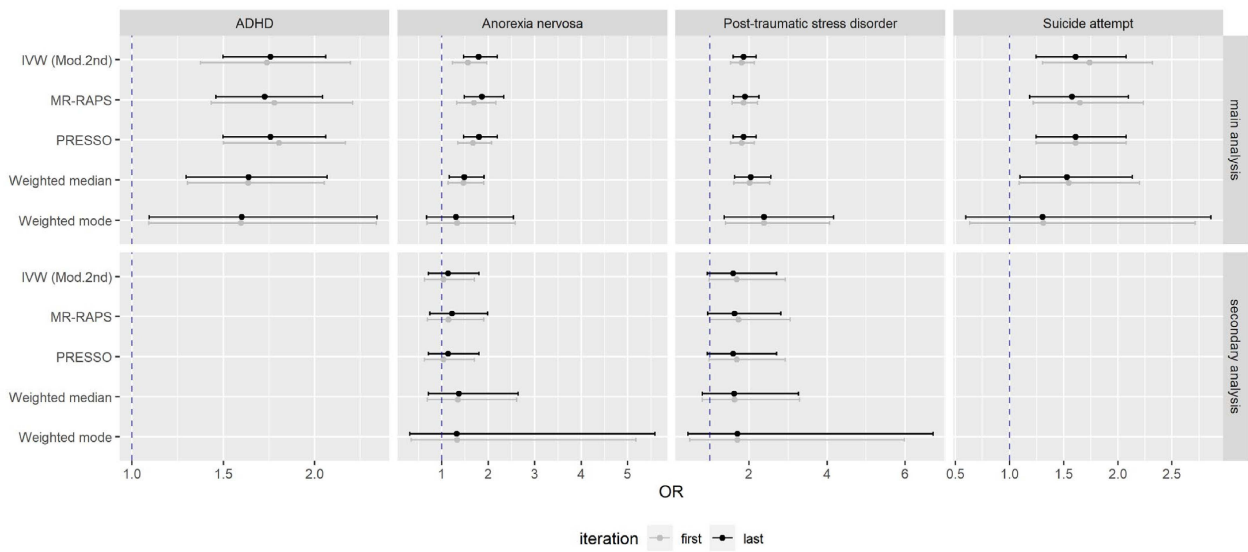

**Supplementary Figure 5** Sensitivity analyses of network Mendelian randomization studies investigating the effects of anorexia nervosa on psychiatric outcomes

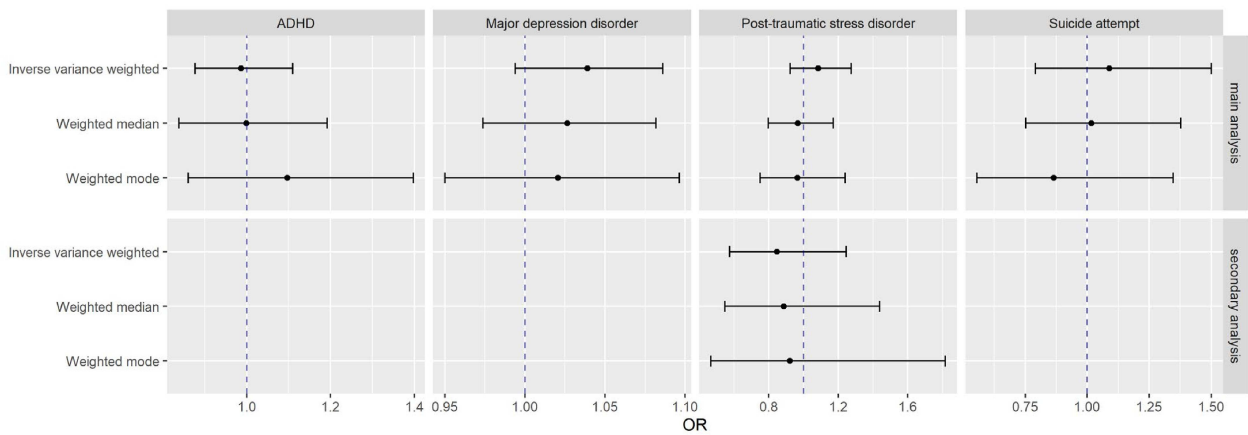



**Supplementary Figure 6** Multivariable Mendelian randomization sensitivity analyses investigating the direct effects of ADHD and major depression disorder on both PTSD and suicide attempt

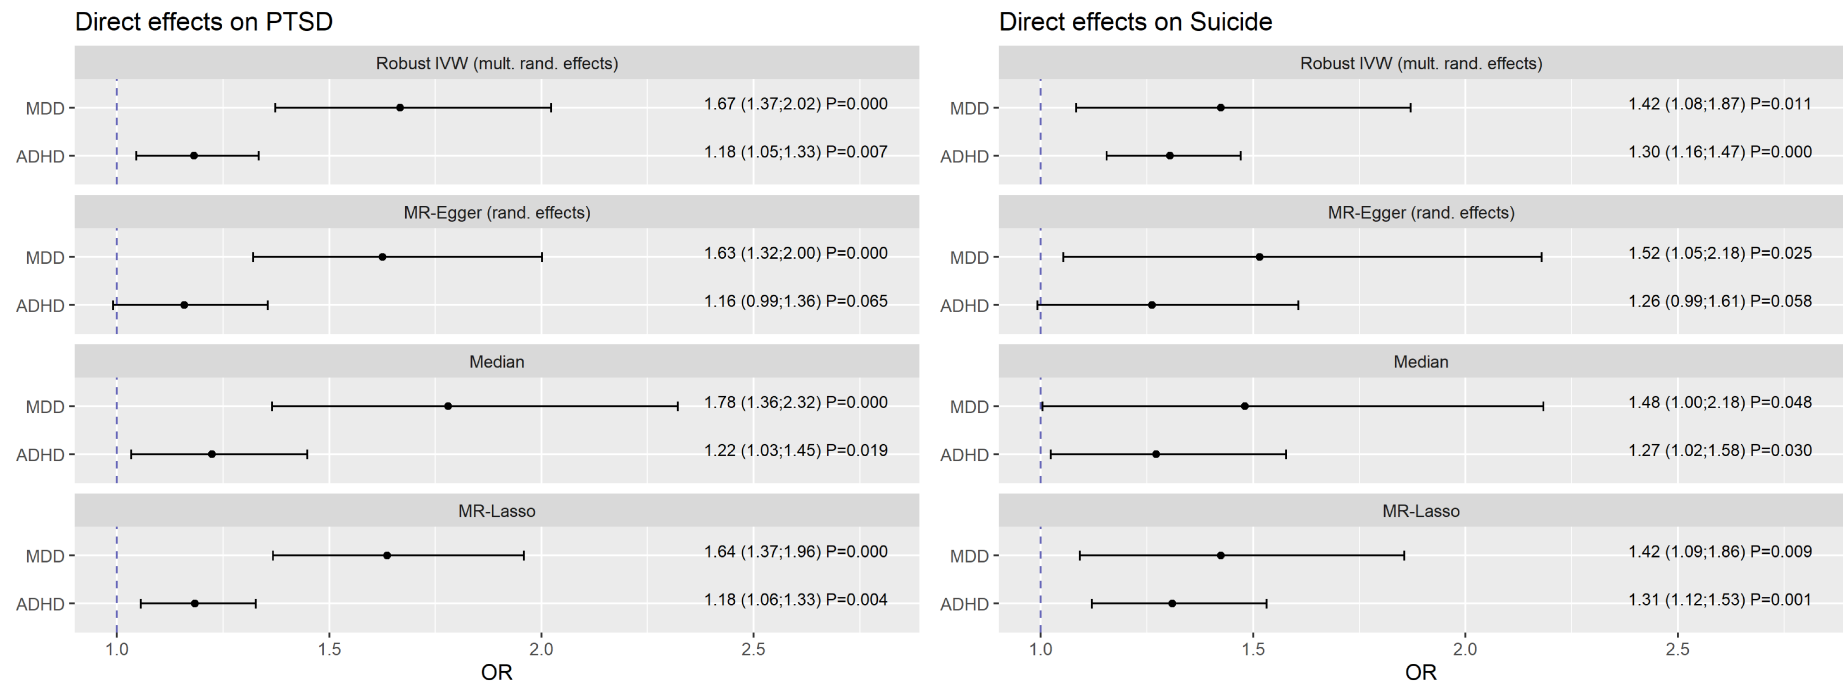

Supplement: bmjment-2022-300642supp001_data_supplement.pdf [file bmjment-2022-300642supp001_data_supplement.pdf]
